# Supplementary material for: A comparison study of the influence of milk protein versus whey protein in high-protein diets on adiposity in rats
Source: Royal Society of Chemistry journal article supplement (doi:10.1039/d0fo01960g), 2021-01-01
Supplement: d0fo01960g1.pdf [file d0fo01960g1.pdf]

Table S1 Amino acid composition

| AA <sub>s</sub> (%) | MPC   | WPC   |
|---------------------|-------|-------|
| Phe                 | 4.70  | 3.50  |
| Tyr                 | 4.05  | 2.55  |
| Ala                 | 3.11  | 4.59  |
| Met                 | 2.63  | 2.10  |
| Cys                 | 0.21  | 0.95  |
| Pro                 | 10.68 | 5.59  |
| Gly                 | 1.76  | 1.98  |
| Glu                 | 21.61 | 18.73 |
| Arg                 | 3.56  | 2.68  |
| Lys                 | 7.24  | 8.93  |
| Leu                 | 8.79  | 10.00 |
| Ser                 | 4.22  | 3.79  |
| Thr                 | 3.71  | 5.89  |
| Asp                 | 8.35  | 13.08 |
| Val                 | 5.99  | 5.80  |
| Ile                 | 5.21  | 6.58  |
| His                 | 2.63  | 1.99  |
| Trp                 | 1.52  | 1.27  |

MPC, milk protein concentrate; WPC, whey protein concentrate; % represents the amino acid composition ratio of the two proteins. Phe, phenylalanine; Tyr, tyrosine; Ala, alanine; Met, Methionine; Cys, cysteine; Pro, proline; Gly, glycine; Glu, glutamic acid; Arg, arginine; Lys, lysine; Leu, leucine; Ser, serine; Thr, threonine; Asp, aspartic acid; Val, valine; Ile, isoleucine; His, histidine; Trp, tryptophan.

Table S2 Nutrient composition of rat diets

|                       | MPC    |        |        |        | WPC    |        |        |        |
|-----------------------|--------|--------|--------|--------|--------|--------|--------|--------|
|                       | L-14   | L-40   | H-14   | H-40   | L-14   | L-40   | H-14   | H-40   |
|                       | %      | %      | %      | %      | %      | %      | %      | %      |
| g/Kg Diet             |        |        |        |        |        |        |        |        |
| Protein               | 140    | 400    | 160    | 460    | 140    | 400    | 160    | 460    |
| Sucrose               | 103.3  | 66.72  | 264.83 | 180.35 | 103.3  | 66.72  | 264.83 | 180.35 |
| Corn starch           | 637    | 414.08 | 336.06 | 120.35 | 637    | 414.08 | 336.06 | 120.35 |
| Soybean oil           | 40     | 40     | 40     | 40     | 40     | 40     | 40     | 40     |
| Lard oil              | 0      | 0      | 120    | 120    | 0      | 0      | 120    | 120    |
| Minerals              | 27.32  | 27.32  | 27.32  | 27.32  | 27.32  | 27.32  | 27.32  | 27.32  |
| Vitamins              | 0.25   | 0.25   | 0.25   | 0.25   | 0.25   | 0.25   | 0.25   | 0.25   |
| Cellulose             | 50     | 50     | 50     | 50     | 50     | 50     | 50     | 50     |
| Choline               | 2.3    | 2.3    | 2.3    | 2.3    | 2.3    | 2.3    | 2.3    | 2.3    |
| Total                 | 1000.2 | 1000.7 | 1000.8 | 1000.6 | 1000.2 | 1000.7 | 1000.8 | 1000.6 |
| Percentage of energy  |        |        |        |        |        |        |        |        |
| Total protein(%)      | 14.43  | 41.20  | 14.27  | 41.04  | 14.43  | 41.20  | 14.27  | 41.04  |
| Total carbohydrate(%) | 76.30  | 49.53  | 53.61  | 26.83  | 76.30  | 49.53  | 53.61  | 26.83  |
| Total fat(%)          | 9.28   | 9.28   | 32.12  | 32.12  | 9.28   | 9.28   | 32.12  | 32.12  |
| Total energy(Kcal/Kg) | 3881   | 3883   | 4483   | 4483   | 3881   | 3883   | 4483   | 4483   |

MPC, milk protein concentrate; WPC, whey protein concentrate.

Table S3 Primers used in Real-time PCR

|                | forward primer (5'-3')   | reverse primer (5'-3')   |
|----------------|--------------------------|--------------------------|
| $\beta$ -actin | CCCGCGAGTACAACCTTCTTG    | ACCCATACCCACCATCACAC     |
| UCP1           | GTGAGTTCGACAACCTCCGAAGTG | CATGAGGTCATATGTCACCAGCTC |
| HSL            | CGCCTTACGGAGTCTATGC      | GAGGACACCTTGGCTTGA       |
| ACC            | CAATCCTCGGCACATGGAGA     | GCTCAGCCAAGCGGATGTAGA    |
| FASN           | CAGGTGTGTGATGGGAAG       | TGTGGATGATGTTGATGATAG    |
| SCD1           | ACCTTGCTCTGGGGGATATT     | TCCGCCCTTCTCTTTGACA      |
| CPT1           | CCCTAAGCCCACAAGGCTAC     | TCTCTGTCCCTCCCTTCTCGG    |
| ACOX1          | CAAGGAGAGTGCTACGGGTTA    | TTCAGGTAGCCGTTATCCAT     |
| FGF21          | GTGCGAGGCATACCCCATC      | CCGTCCTCCCTGATCTCCA      |
| PPAR $\alpha$  | TGGTGCATTTGGGCGTAACTC    | ACATGCGTGGACTCCATAGTG    |
| CBS            | CGTGATGCCTGAGAAGATGAGT   | CACCGATGATTTTACAACCTGG   |
| CTH            | CCAGCACTTTGCCACTCA       | TGCCTCCATACACTTCATCC     |
| ATF4           | GCCATCTCCCAGAAAGT        | GAACCACGAGGAACACC        |

UCP1, uncoupling protein 1; HSL, hormone-sensitive lipase; ACC, acetyl-Coenzyme A carboxylase alpha; FASN, fatty acid synthase; SCD1, stearoyl-CoA desaturase-1; CPT1, carnitine palmitoyl transferase 1; ACOX1, acyl-Coenzyme A oxidase 1; FGF21, fibroblast growth factor 21; PPAR $\alpha$ , Peroxisome proliferator-activated receptor alpha. CBS, cystathionine  $\beta$ -synthase; CTH, cystathionine  $\gamma$ -lyase; ATF4, activating transcription factor 4.
